# Supplementary material
Source: publisher figshare collection journal article supplement (https://sage.figshare.com/ndownloader/files/14024054)
Supplement: Supplementary file 1 [file 14024054]

## Appendix A: Study 1 Measures

The purpose of this study is to understand people's knowledge of and reactions to various social groups. Emotion stereotypes exist in our culture. Some groups are thought to be especially likely or unlikely to express certain emotions. You will be asked to indicate what emotions make up cultural emotion stereotypes for different social groups in our culture -- regardless of whether you believe them to be true. Next, you will be asked whether you personally believe that those emotions really are expressed more or less often by those social groups. All of your responses are completely confidential. Please do not write your name or any other identifying information in this questionnaire. You will be asked to answer each set questions for a number of social groups.

For the next portion of this survey please think about whether there is a cultural stereotype about WHITE WOMEN and the emotions they express. Please answer the following questions about what stereotypes you think exist, even if you do not believe they are true. Later, you will be asked about what stereotypes you personally believe are true.

Please read through this list of emotions carefully and for each emotion please check whether each emotion is (according to the cultural stereotype) either:

- (a) especially LIKELY,
- (b) especially UN-likely, or
- (c) NOT part of the WHITE WOMEN stereotype.

So, for each emotion, ask yourself whether you think it is part of the cultural stereotype that WHITE WOMEN are especially LIKELY to express fear (for example), especially UN-likely to express fear, or whether fear is just NOT part of the stereotype about WHITE WOMEN. Remember, this is not about what you personally believe, but about stereotypes that you believe exist even if you do not believe them. That is, this is not about what YOU believe, but what you think OTHERS believe to be true about WHITE WOMEN.

Think of WHITE WOMEN and check one column for each emotion.

|               | Part of the stereotype:<br>WHITE WOMEN are<br>especially LIKELY<br>to: | Part of the stereotype:<br>WHITE WOMEN are<br>especially<br><u>UN</u> LIKELY to: | NOT part of the<br>stereotype about<br>WHITE WOMEN. |
|---------------|------------------------------------------------------------------------|----------------------------------------------------------------------------------|-----------------------------------------------------|
| express FEAR  | <input type="radio"/>                                                  | <input type="radio"/>                                                            | <input type="radio"/>                               |
| express ANGER | <input type="radio"/>                                                  | <input type="radio"/>                                                            | <input type="radio"/>                               |

[page break]

About which group did you just answer questions about?

- White Men
- White Women
- African American Men
- African American Women

## Appendix B: Screenshots of Deliberation Procedure Example

You will be sending and receiving messages with your fellow jurors. To keep track of who said what we need to identify your messages with a name. To preserve your anonymity, please do not reveal your real full name. Instead, select a username that does not give away your identity.

---

Anonymous Username (not your real full name):

>>

Please wait while your group is being randomly formed

---



Meet your group!

JJohnson  
Uic2011  
syoun96  
Jfitzg5  
PARTICIPANT'S NAME

---

>>

Is the defendant "not guilty" or "guilty"? Please select **ONE**:  
(This is a public answer that your co-jurors will see.)

NOT GUILTY

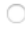

GUILTY

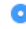

Please explain your reason(s) for your verdict and any other comments that you want your co-jurors to read. Feel free to state your reasons for the entire group, or to address individual co-jurors in your comments. (This is a public answer that your co-jurors will see.)

I will not change my verdict!

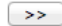

Please wait for your group to finish answering the questions

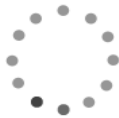

#### Round 1 Results

JJohnson - GUILTY - He was scared that she was going to leave him and take away his kids and family

JasonS - NOT GUILTY - first of all, there hasn't been a sure evidence that he murdered her. we need to have more evidence before we decide he is guilty or not (yet)

Uic2011 - GUILTY - the motive that his wife was going to leave him can drive a man to kill

syoun96 - GUILTY - She threatened to leave him and take their children

Jfitzg5 - GUILTY - Michael doesn't have any record of where he was between 6am and 10am, when he dropped his parents off and when he went to see the counselor (which he could have just done to provide himself an alibi)

*PARTICIPANT'S NAME* - GUILTY - I will not change my verdict!

## Appendix C: Deliberation Scripts

Note that only the first four rounds were included in the online Study 2. All seven rounds were included for the in-person laboratory study in Study 3. Study 2 included the no emotion, anger, and fear conditions. Study 3 included only the no emotion and anger conditions. The bolded portions represent manipulated sections of the script. The no emotion control condition did not include any of the bolded emotion statements. Further, the no emotion and fear conditions did not include any capital letters or exclamation points—these were present only in the anger condition. That is, the non-bolded language was identical across conditions, some of the words were converted to capital letters in the anger condition.

### Deliberation Script #1: Participant votes Not Guilty and Holdout votes Guilty

Round 1 (No holdouts express emotion until Round 2):

|                               |               |                                                                                                                                                                                                                                                                                                                                                                                                                                      |
|-------------------------------|---------------|--------------------------------------------------------------------------------------------------------------------------------------------------------------------------------------------------------------------------------------------------------------------------------------------------------------------------------------------------------------------------------------------------------------------------------------|
| JJohnson                      | NOT<br>GUILTY | The defentant's timeline on the date and evening in question marks no holes even though he had significant time alone                                                                                                                                                                                                                                                                                                                |
| [Manipulated<br>Holdout Name] | GUILTY        | <i>No emotion control:</i><br>because of the intent and ruthlessness and the fact the victim had two wounds, across both vein and artery.<br><br><i>Anger condition:</i><br>because of the intent and ruthlessness and the fact the victim had two wounds, across both vein and artery.<br><br><i>Fear condition:</i><br>because of the intent and ruthlessness and the fact the victim had two wounds, across both vein and artery. |
| Uic2011                       | NOT<br>GUILTY | Stacy was known to have been having lots of depression, and depression leads to serious acts like this one.                                                                                                                                                                                                                                                                                                                          |
| syou96                        | NOT<br>GUILTY | the witnesses behind michael such as the neighbors, show favor in michael's case. seeing as he went to marriage counseling and sounding terribly worried about his wife, the evidence of her suicide seem probable.                                                                                                                                                                                                                  |
| Jfitzg5                       | NOT<br>GUILTY | the fact that the parents were in the house with Michael and Stacy that Sunday night and Monday morning, and did not hear any acts of murder.                                                                                                                                                                                                                                                                                        |

Round 2:

|                            |               |                                                                                                                                                                                                                                                                                                                                                                                                                                                                                                                                                                                                                                                                                                                                                                                                                                                                                                              |
|----------------------------|---------------|--------------------------------------------------------------------------------------------------------------------------------------------------------------------------------------------------------------------------------------------------------------------------------------------------------------------------------------------------------------------------------------------------------------------------------------------------------------------------------------------------------------------------------------------------------------------------------------------------------------------------------------------------------------------------------------------------------------------------------------------------------------------------------------------------------------------------------------------------------------------------------------------------------------|
| JJohnson                   | NOT<br>GUILTY | [Manipulated Holdout Name]: yeah, she had two wounds, but there was no sign of blood on clothes, draining system or any of his clothes, it is very difficult not to get any blood on yourself                                                                                                                                                                                                                                                                                                                                                                                                                                                                                                                                                                                                                                                                                                                |
| [Manipulated Holdout Name] | GUILTY        | <p><i>No emotion control:</i><br/>michael's story doesn't make sense. for example, if he was too distressed, would he still call the police? he wasn't distressed enough to visit a counselor but he was too distressed to call the police? doesn't add up.</p> <p><i>Anger condition:</i><br/><b>Seriously, this just makes me angry...</b>michael's story DOESN'T MAKE SENSE! for example, if he was too distressed, would he still call the police???? he wasn't distressed enough to visit a counselor but he was too distressed to call the police? DOESN'T ADD UP!</p> <p><i>Fear condition:</i><br/>michael's story doesn't make sense. for example, if he was too distressed, would he still call the police? he wasn't distressed enough to visit a counselor but he was too distressed to call the police? doesn't add up. <b>It scares the shit out of me that this kind of thing happens</b></p> |
| Uic2011                    | NOT<br>GUILTY | even if stacy stevens was murdered, there is no empirical evidence pointing to michael stevens (dna evidence)                                                                                                                                                                                                                                                                                                                                                                                                                                                                                                                                                                                                                                                                                                                                                                                                |
| syoun96                    | NOT<br>GUILTY | it was mentioned that there was not a lot of blood in the scene like if it were a murder                                                                                                                                                                                                                                                                                                                                                                                                                                                                                                                                                                                                                                                                                                                                                                                                                     |
| Jfitzg5                    | NOT<br>GUILTY | there was no fingerprints taken of the murder weapon to link Michael directly to the crime so therefore I have a reasonable doubt.                                                                                                                                                                                                                                                                                                                                                                                                                                                                                                                                                                                                                                                                                                                                                                           |

Round 3:

|                            |               |                                                                                                                                                                                                                        |
|----------------------------|---------------|------------------------------------------------------------------------------------------------------------------------------------------------------------------------------------------------------------------------|
| JJohnson                   | NOT<br>GUILTY | yeah, but there was no traces of blood in the sewage system, so micheal stevens did not wash off any blood                                                                                                             |
| [Manipulated Holdout Name] | GUILTY        | <p><i>No emotion control:</i><br/>sure, forensic stuff would be nice, but why would a mean "leave" the house in search for his wife, when he claims to be worried about her. he should have tried to open the door</p> |

|         |            |                                                                                                                                                                                                                                                                                                                                                                                                                                                                                                                                                                                                                                                                                                    |
|---------|------------|----------------------------------------------------------------------------------------------------------------------------------------------------------------------------------------------------------------------------------------------------------------------------------------------------------------------------------------------------------------------------------------------------------------------------------------------------------------------------------------------------------------------------------------------------------------------------------------------------------------------------------------------------------------------------------------------------|
|         |            | <p>himself to see how she was doing</p> <p><i>Anger condition:</i><br/> sure, forensic stuff would be nice, but WHY would a mean "leave" the house in search for his wife, when he CLAIMS to be worried about her. he should have tried to open the door himself to see how she was doing!! <b>It's pretty aggravating I'm the only one who sees that!!!!</b></p> <p><i>Fear condition:</i><br/> <b>this story freaks me out... I'm going to have nightmares...anyway...</b> sure, forensic stuff would be nice, but why would a mean "leave" the house in search for his wife, when he claims to be worried about her. he should have tried to open the door himself to see how she was doing</p> |
| Uic2011 | NOT GUILTY | [AlicaS/JasonS]: I hear what you are saying, but that's all circumstantial.. there is no solid evidence that michael stevens did the act. the pathologists disagreed whether it was a suicide or murder                                                                                                                                                                                                                                                                                                                                                                                                                                                                                            |
| syoun96 | NOT GUILTY | no blood found on michael stevens' clothes or in drainage...but [Manipulated Holdout Name] does kind of have a point...                                                                                                                                                                                                                                                                                                                                                                                                                                                                                                                                                                            |
| Jfitzg5 | NOT GUILTY | there was not any hard evidence showing mr. stevens committed the murder (ie, fingerprints, shoe prints, bloody cloths or eyewitnesses)                                                                                                                                                                                                                                                                                                                                                                                                                                                                                                                                                            |

Round 4:

|                            |            |                                                                                                                                                                                                                                                                                                                                                                                 |
|----------------------------|------------|---------------------------------------------------------------------------------------------------------------------------------------------------------------------------------------------------------------------------------------------------------------------------------------------------------------------------------------------------------------------------------|
| JJohnson                   | NOT GUILTY | The defendant provided more adequate and plausible evidence                                                                                                                                                                                                                                                                                                                     |
| [Manipulated Holdout Name] | GUILTY     | <p><i>No emotion control:</i><br/> Upon finding the bedroom door locked, michael stevens made no attempt to access the bedroom, and claims that he belived she was behind the locked door, yet called family and neighbors to attempt to locate him... why wouldn't he have tried to get in? There is no hard evidence it was suicide either</p> <p><i>Anger condition:</i></p> |

|         |               |                                                                                                                                                                                                                                                                                                                                                                                                                                                                                                                                                                                                                                                                                                                                                                         |
|---------|---------------|-------------------------------------------------------------------------------------------------------------------------------------------------------------------------------------------------------------------------------------------------------------------------------------------------------------------------------------------------------------------------------------------------------------------------------------------------------------------------------------------------------------------------------------------------------------------------------------------------------------------------------------------------------------------------------------------------------------------------------------------------------------------------|
|         |               | <p><b>Ok, COME ON!</b> Upon finding the bedroom door locked, michael stevens made NO attempt to access the bedroom, and claims that he belived she was behind the locked door, yet called family and neighbors to attempt to locate him... <b>Seriously?!</b> why wouldn't he have tried to get in? There is no hard evidence it was suicide either. <b>This is SO FRUSTRATING</b></p> <p><i>Fear condition:</i><br/>Upon finding the bedroom door locked, michael stevens made no attempt to access the bedroom, and claims that he belived she was behind the locked door, yet called family and neighbors to attempt to locate him... why wouldn't he have tried to get in? There is no hard evidence it was suicide either... <b>the whole thing is creepy.</b></p> |
| Uic2011 | NOT<br>GUILTY | there is no evidence that he committed a murder                                                                                                                                                                                                                                                                                                                                                                                                                                                                                                                                                                                                                                                                                                                         |
| syoun96 | NOT<br>GUILTY | not sure                                                                                                                                                                                                                                                                                                                                                                                                                                                                                                                                                                                                                                                                                                                                                                |
| Jfitzg5 | NOT<br>GUILTY | forensic and crime scene evidence had shown that both scenarios were possible                                                                                                                                                                                                                                                                                                                                                                                                                                                                                                                                                                                                                                                                                           |

Round 5:

|                               |               |                                                                                                                                                                                                                                                                                                                                                                                                                                                                                                                                                                                                                                                                                                                                                       |
|-------------------------------|---------------|-------------------------------------------------------------------------------------------------------------------------------------------------------------------------------------------------------------------------------------------------------------------------------------------------------------------------------------------------------------------------------------------------------------------------------------------------------------------------------------------------------------------------------------------------------------------------------------------------------------------------------------------------------------------------------------------------------------------------------------------------------|
| JJohnson                      | NOT<br>GUILTY | Plus timeline indicates these wouldn't have been much time between michael talking to his neighbors and the police finding the body                                                                                                                                                                                                                                                                                                                                                                                                                                                                                                                                                                                                                   |
| [Manipulated<br>Holdout Name] | GUILTY        | <p><i>No emotion control:</i><br/>I just don't think any of that is as important as the fact that i find it hard to believe that she would be able to cut her neck twice and be able to move. also michael was the last person to be in contact w/ her. no one else could have been around her. he was just smart enough about what moves to make, in order to seem like he didn't do anything.</p> <p><i>Anger condition:</i><br/>I just don't think any of that is as important as the fact that i find it <b>SERIOUSLY</b> hard to believe that she would be able to cut her neck twice and be able to move. also michael was the last person to be in contact w/ her. <b>NO ONE ELSE COULD HAVE BEEN AROUND HER.</b> he was just smart enough</p> |



|         |               |                                                                                                                                   |
|---------|---------------|-----------------------------------------------------------------------------------------------------------------------------------|
|         |               | about what moves to make, in order to seem like he didn't do anything. <b>It pisses me off that nobody is seeing through this</b> |
| Uic2011 | NOT<br>GUILTY | michael went to marriage counseling and seemed concerned about his wife                                                           |
| syoun96 | GUILTY        | I think I'm changing to guilty...                                                                                                 |
| Jfitzg5 | NOT<br>GUILTY | there were "superficial" cuts by the 2 main wounds which is common amongst suicides....shows doubt                                |

Round 6:

|                            |               |                                                                                                                                                                                                                                                                                                                                                                                                                                                                                                                                                                                                                         |
|----------------------------|---------------|-------------------------------------------------------------------------------------------------------------------------------------------------------------------------------------------------------------------------------------------------------------------------------------------------------------------------------------------------------------------------------------------------------------------------------------------------------------------------------------------------------------------------------------------------------------------------------------------------------------------------|
| JJohnson                   | NOT<br>GUILTY | stacy stevens suffered from depression and made a threat of suicide to her husband the night before during an argument                                                                                                                                                                                                                                                                                                                                                                                                                                                                                                  |
| [Manipulated Holdout Name] | GUILTY        | <i>No emotion control:</i><br>Michael stevens side of the story is very questionable. It seems that he planned the entire murder by locking the door from the inside sending off his parents and talking to a mentor to make it look like he was working on fixing his marriage.<br><br><i>Anger condition:</i><br><b>Ok, this is getting pretty fn frustrating.</b> Michael stevens side of the story is VERY QUESTIONABLE. It seems that he planned the entire murder by locking the door from the inside sending off his parents and talking to a mentor to make it look like he was working on fixing his marriage. |
| Uic2011                    | NOT<br>GUILTY | Not enough evidence to prove he intended to hurt/kill his wife stacy                                                                                                                                                                                                                                                                                                                                                                                                                                                                                                                                                    |
| syoun96                    | GUILTY        | I think [Manipulated Holdout Name] is right..                                                                                                                                                                                                                                                                                                                                                                                                                                                                                                                                                                           |
| Jfitzg5                    | NOT<br>GUILTY | The guy said that the way the cuts looked like a suicide because of the superficial cuts...                                                                                                                                                                                                                                                                                                                                                                                                                                                                                                                             |

Round 7:

|          |               |                                                                                                                                                                                 |
|----------|---------------|---------------------------------------------------------------------------------------------------------------------------------------------------------------------------------|
| JJohnson | NOT<br>GUILTY | Based on the information that there had been two cuts along her throat. In most homicide cases, it is usually seen that it only takes them a single incision to kill the victim |
|----------|---------------|---------------------------------------------------------------------------------------------------------------------------------------------------------------------------------|

|                            |            |                                                                                                                                                                                                                                                                                                                                                                                                                                                                 |
|----------------------------|------------|-----------------------------------------------------------------------------------------------------------------------------------------------------------------------------------------------------------------------------------------------------------------------------------------------------------------------------------------------------------------------------------------------------------------------------------------------------------------|
| [Manipulated Holdout Name] | GUILTY     | <p><i>No emotion control:</i><br/>he had suspicious activity before they found her and he took his parents to his sister's house, i don't understand why he did that if he was just going to talk to her.</p> <p><i>Anger condition:</i><br/>he had suspicious activity before they found her and he <b>TOOK HIS PARENTS TO HIS SISTER'S HOUSE!</b> i don't understand why he did that if he was just going to talk to her??? <b>This is infuriating...</b></p> |
| Uic2011                    | NOT GUILTY | I just still really don't think there's enough evidence                                                                                                                                                                                                                                                                                                                                                                                                         |
| syoun96                    | GUILTY     | we have to make sure we do what the law says                                                                                                                                                                                                                                                                                                                                                                                                                    |
| Jfitz5                     | NOT GUILTY | No forensic evidence was found linking defendant to murder.                                                                                                                                                                                                                                                                                                                                                                                                     |

Deliberation Script #2: Participant votes Guilty and Holdout votes Not Guilty

Round 1 (No holdouts express emotion until Round 2):

|                            |            |                                                                                                                                                                                                                                                                                                                                                                                                                                                                                                                                                         |
|----------------------------|------------|---------------------------------------------------------------------------------------------------------------------------------------------------------------------------------------------------------------------------------------------------------------------------------------------------------------------------------------------------------------------------------------------------------------------------------------------------------------------------------------------------------------------------------------------------------|
| JJohnson                   | GUILTY     | He was scared that she was going to leave him and take away his kids and family                                                                                                                                                                                                                                                                                                                                                                                                                                                                         |
| [Manipulated Holdout Name] | NOT GUILTY | <p><i>No emotion control:</i><br/>first of all, there hasn't been a sure evidence that he murdered her. we need to have more evidence before we decide he is guilty or not (yet)</p> <p><i>Anger condition:</i><br/>first of all, there hasn't been a sure evidence that he murdered her. we need to have more evidence before we decide he is guilty or not (yet)</p> <p><i>Fear condition:</i><br/>first of all, there hasn't been a sure evidence that he murdered her. we need to have more evidence before we decide he is guilty or not (yet)</p> |
| Uic2011                    | GUILTY     | the motive that his wife was going to leave him can drive a                                                                                                                                                                                                                                                                                                                                                                                                                                                                                             |

|         |        |                                                                                                                                                                                                         |
|---------|--------|---------------------------------------------------------------------------------------------------------------------------------------------------------------------------------------------------------|
|         |        | man to kill                                                                                                                                                                                             |
| syoun96 | GUILTY | She threatened to leave him and take their children                                                                                                                                                     |
| Jfitzg5 | GUILTY | Michael doesn't have any record of where he was between 6am and 10am, when he dropped his parents off and when he went to see the counselor (which he could have just done to provide himself an alibi) |

Round 2:

|                            |            |                                                                                                                                                                                                                                                                                                                                                                                                                                                                                                                                                                                                                                                                                                                                                                                                                                                                                                         |
|----------------------------|------------|---------------------------------------------------------------------------------------------------------------------------------------------------------------------------------------------------------------------------------------------------------------------------------------------------------------------------------------------------------------------------------------------------------------------------------------------------------------------------------------------------------------------------------------------------------------------------------------------------------------------------------------------------------------------------------------------------------------------------------------------------------------------------------------------------------------------------------------------------------------------------------------------------------|
| JJohnson                   | GUILTY     | if michael was truly worried about his wife, he would have immediately called the police instead of going to his neighbors. by michael going to his neighbors, it made me think that he was just trying to make his story sound believable.                                                                                                                                                                                                                                                                                                                                                                                                                                                                                                                                                                                                                                                             |
| [Manipulated Holdout Name] | NOT GUILTY | <p><i>No emotion control:</i><br/>the wound itself -- due to the cut was made -- if you were suicidal and right handed you would start the cut from hte left... also how they are parallel and the blood was only found on her room and nowhere else</p> <p><i>Anger condition:</i><br/><b>Seriously, this just makes me angry...</b>the wound itself -- due to the cut was made -- if you were suicidal and right handed you would <b>START THE CUT FROM THE LEFT...</b> also how they are parallel and the blood was <b>ONLY FOUND ON HER ROOM</b> and nowhere else!!</p> <p><i>Fear condition:</i><br/>the wound itself -- due to the cut was made -- if you were suicidal and right handed you would start the cut from hte left... also how they are parallel and the blood was only found on her room and nowhere else... <b>It scares the shit out of me that this kind of thing happens</b></p> |
| Uic2011                    | GUILTY     | the cuts on her throat would be to deep for her to cut it herself (it also might have been clever for him to cut it several times to cover up the evidence and make it look like she was trying to suicide)                                                                                                                                                                                                                                                                                                                                                                                                                                                                                                                                                                                                                                                                                             |
| syoun96                    | GUILTY     | defendent was the only person that had access to the victim                                                                                                                                                                                                                                                                                                                                                                                                                                                                                                                                                                                                                                                                                                                                                                                                                                             |

|         |        |                                                                   |
|---------|--------|-------------------------------------------------------------------|
|         |        | and there was a motive to cause harm                              |
| Jfitzg5 | GUILTY | No one knows exactly if he was sleeping from the night until day. |

Round 3:

|                            |            |                                                                                                                                                                                                                                                                                                                                                                                                                                                                                                                                                                                                                                                                                                                                                                                                                                                                                                                                                                                                                                                                |
|----------------------------|------------|----------------------------------------------------------------------------------------------------------------------------------------------------------------------------------------------------------------------------------------------------------------------------------------------------------------------------------------------------------------------------------------------------------------------------------------------------------------------------------------------------------------------------------------------------------------------------------------------------------------------------------------------------------------------------------------------------------------------------------------------------------------------------------------------------------------------------------------------------------------------------------------------------------------------------------------------------------------------------------------------------------------------------------------------------------------|
| JJohnson                   | GUILTY     | threatened to have children taken from him by stacy                                                                                                                                                                                                                                                                                                                                                                                                                                                                                                                                                                                                                                                                                                                                                                                                                                                                                                                                                                                                            |
| [Manipulated Holdout Name] | NOT GUILTY | <p><i>No emotion control:</i><br/>I hear what you guys are saying, but michael did not know how to make it "look" like the door was locked on the inside, if the wife was murdered the parents in the house probably would've heard, and the argument was not a great enough reason for murder.</p> <p><i>Anger condition:</i><br/>I hear what you guys are saying, but michael DID NOT KNOW HOW to make it "look" like the door was locked on the inside, if the wife was murdered the parents in the house probably would've heard, and the argument was not a great enough reason for murder!! <b>It's pretty aggravating I'm the only one who sees that!!!!</b></p> <p><i>Fear condition:</i><br/><b>wow, this case really freaks me out... I'm going to have nightmares...anyway...</b> I hear what you guys are saying, but michael did not know how to make it "look" like the door was locked on the inside, if the wife was murdered the parents in the house probably would've heard, and the argument was not a great enough reason for murder.</p> |
| Uic2011                    | GUILTY     | he tried very hard on Monday morning to get many people to see him be worried and upset                                                                                                                                                                                                                                                                                                                                                                                                                                                                                                                                                                                                                                                                                                                                                                                                                                                                                                                                                                        |
| syoun96                    | GUILTY     | His morning and night activities were suspicious...but [Manipulated Holdout Name] does kind of have a point...                                                                                                                                                                                                                                                                                                                                                                                                                                                                                                                                                                                                                                                                                                                                                                                                                                                                                                                                                 |
| Jfitzg5                    | GUILTY     | no one else had access to her                                                                                                                                                                                                                                                                                                                                                                                                                                                                                                                                                                                                                                                                                                                                                                                                                                                                                                                                                                                                                                  |

Round 4:

|                            |            |                                                                                                                                                                                                                                                                                                                                                                                      |
|----------------------------|------------|--------------------------------------------------------------------------------------------------------------------------------------------------------------------------------------------------------------------------------------------------------------------------------------------------------------------------------------------------------------------------------------|
| JJohnson                   | GUILTY     | Nobody knew where husband was monday morning                                                                                                                                                                                                                                                                                                                                         |
| [Manipulated Holdout Name] | NOT GUILTY | <i>No emotion control:</i><br>he would have to be a really smart to plan his day like he did.<br><br><i>Anger condition:</i><br>Ok, COME ON! he would have to be a really smart to plan his day like he did. Seriously?! This is SO FRUSTRATING<br><br><i>Fear condition:</i><br>he would have to be a really smart to plan his day like he did.<br><b>the whole thing is creepy</b> |
| Uic2011                    | GUILTY     | William took his parents away just before the incident. Since their marriage they probably have had similar encounters which does not explain why they had to be taken away.                                                                                                                                                                                                         |
| syoun96                    | GUILTY     | not sure                                                                                                                                                                                                                                                                                                                                                                             |
| Jfitzg5                    | GUILTY     | he left her alone in a room knowing of her problems                                                                                                                                                                                                                                                                                                                                  |

Round 5:

|                            |            |                                                                                                                                                                                                                                                                                                                                                                                                                                                                                                                                                     |
|----------------------------|------------|-----------------------------------------------------------------------------------------------------------------------------------------------------------------------------------------------------------------------------------------------------------------------------------------------------------------------------------------------------------------------------------------------------------------------------------------------------------------------------------------------------------------------------------------------------|
| JJohnson                   | GUILTY     | suspicious behavior of asking relatives even though he left the house knowing wife was locked inside her room                                                                                                                                                                                                                                                                                                                                                                                                                                       |
| [Manipulated Holdout Name] | NOT GUILTY | <i>No emotion control:</i><br>I just don't think any of that is as important as the fact that a guilty verdict would seemingly be made not on hard evidence but by assumptions based on behavior and environmental actions<br><br><i>Anger condition:</i><br>I just <b>SERIOUSLY</b> don't think any of that is as important as the fact that a guilty verdict would seemingly be made <b>NOT ON HARD EVIDENCE</b> but by <b>ASSUMPTIONS</b> based on behavior and environmental actions <b>It pisses me off that nobody is seeing through this</b> |
| Uic2011                    | GUILTY     | the defendent tried to enter the room in the morning and went to the counseling in order to cover up his actions of murdering his wife.                                                                                                                                                                                                                                                                                                                                                                                                             |
| syoun96                    | NOT        | I think I'm changing to not guilty...                                                                                                                                                                                                                                                                                                                                                                                                                                                                                                               |

|         |        |                                                                                        |
|---------|--------|----------------------------------------------------------------------------------------|
|         | GUILTY |                                                                                        |
| Jfitzg5 | GUILTY | He could have heard noise from his wife's room next door if she was committing suicide |

Round 6:

|                            |            |                                                                                                                                                                                                                                                                                                                                                                                                                                                                                                                                                                                                                                      |
|----------------------------|------------|--------------------------------------------------------------------------------------------------------------------------------------------------------------------------------------------------------------------------------------------------------------------------------------------------------------------------------------------------------------------------------------------------------------------------------------------------------------------------------------------------------------------------------------------------------------------------------------------------------------------------------------|
| JJohnson                   | GUILTY     | the time slot between when he had dropped his parents off to the marriage counselors and then asking his neighbor to call the police was a huge time difference                                                                                                                                                                                                                                                                                                                                                                                                                                                                      |
| [Manipulated Holdout Name] | NOT GUILTY | <i>No emotion control:</i><br>there were no reported signs of a struggle, an individual would not be likely to just allow someone to kill them. there was also two cuts which means that first did not kill so victim would have had time to fight back even if she was caught by surprise<br><br><i>Anger condition:</i><br>Ok, this is getting pretty fn frustrating. there were no reported signs of a struggle, an individual would not be likely to just ALLOW SOMEONE TO KILL THEM. there was also two cuts which means that first did not kill so victim would have had time to fight back even if she was caught by surprise |
| Uic2011                    | GUILTY     | seems as if he tried to cover up by asking for help                                                                                                                                                                                                                                                                                                                                                                                                                                                                                                                                                                                  |
| syoun96                    | NOT GUILTY | I think [Manipulated Holdout Name] is right..                                                                                                                                                                                                                                                                                                                                                                                                                                                                                                                                                                                        |
| Jfitzg5                    | GUILTY     | William claims that she had been locked in the room all night. If that was his claim then why would he have called her aunt looking for Stacey? It is clear that his motive behind that was he wanted Stacy's relative to think he had no clue where she was or what she could be doing.                                                                                                                                                                                                                                                                                                                                             |

Round 7:

|                            |            |                                                                                                                                                                                                    |
|----------------------------|------------|----------------------------------------------------------------------------------------------------------------------------------------------------------------------------------------------------|
| JJohnson                   | GUILTY     | why did he not call the police himself if he was so concerned                                                                                                                                      |
| [Manipulated Holdout Name] | NOT GUILTY | <i>No emotion control:</i><br>he didn't want her to leave, which she mentioned in her argument, so why would he kill her, and take away his children's mother, which would most likely have a huge |

|         |               |                                                                                                                                                                                                                                                                                      |
|---------|---------------|--------------------------------------------------------------------------------------------------------------------------------------------------------------------------------------------------------------------------------------------------------------------------------------|
|         |               | <p>influence on them</p> <p><i>Anger condition:</i><br/> he didn't want her to leave, which she mentioned in her argument, so why would he kill her, and TAKE AWAY HIS CHILDREN'S MOTHER, which would most likely have a huge influence on them??? <b>This is infuriating...</b></p> |
| Uic2011 | GUILTY        | Pathologist proved cuts weren't suicidal cuts, they were perpetrated by someone else                                                                                                                                                                                                 |
| syoun96 | NOT<br>GUILTY | we have to make sure we do what the law says                                                                                                                                                                                                                                         |
| Jfitzg5 | GUILTY        | the crime scene pathologists find that she was murdered - michael tried to hide the knife under her                                                                                                                                                                                  |
